# Supplementary material for: N20D/N116E Combined Mutant Downward Shifted the pH Optimum of Bacillus subtilis NADH Oxidase
Source: MDPI journal article supplement (doi:10.3390/biology12040522), 2023-03-30
Supplement: s1 [file s1]

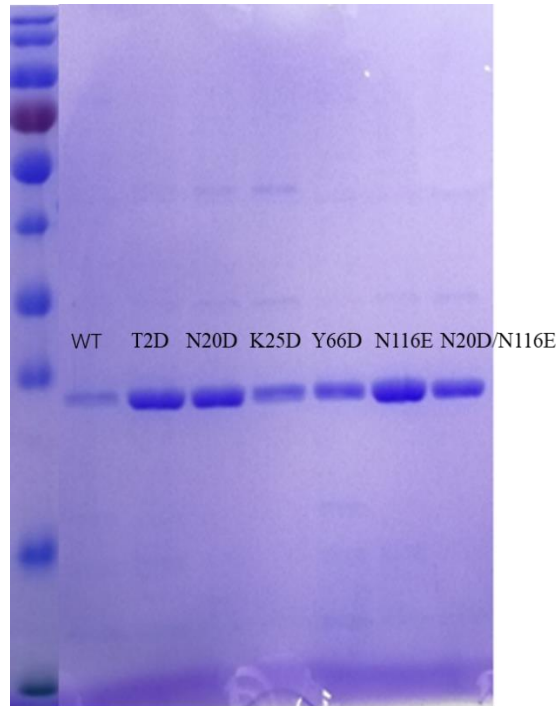

**Figure S1 The gel of the purified BsNox and its variants**

The purified proteins were examined by SDS-PAGE under denaturing conditions, using the prestained marker (Takara, Japan) as the reference.

**Table S1 The bacterial strains, plasmids, and primers used in this study**

| Strains, plasmids, and primers                     | Relevant characteristic or sequence                                                     | Source           |
|----------------------------------------------------|-----------------------------------------------------------------------------------------|------------------|
| <b>Strains</b>                                     |                                                                                         |                  |
| <i>Escherichia coli</i> BL21(DE3)                  | Host                                                                                    | Laboratory stock |
| <i>Bacillus subtilis</i> 168                       | For <i>BsNox</i> gene cloning                                                           | Laboratory stock |
| BL21/pETduet-1- <i>Bsgdh</i> <sub>K218D</sub>      | <i>E. coli</i> BL21 with pETduet-1- <i>Bsgdh</i> <sub>K218D</sub>                       | Laboratory stock |
| BL21/pETduet-1- <i>BsNox</i> <sub>N20D+N116E</sub> | <i>E. coli</i> BL21 with pETduet-1- <i>BsNox</i> <sub>N20D+N116E</sub>                  | This study       |
| <b>Plasmids</b>                                    |                                                                                         |                  |
| pETduet-1                                          | Expression vector                                                                       | Laboratory stock |
| pETduet-1- <i>BsNox</i> <sub>N20D+N116E</sub>      | pETduet-1 with <i>BsNOX</i> <sub>N20D+N116E</sub>                                       | This study       |
| <b>Primers</b>                                     |                                                                                         |                  |
| BsNOX-F                                            | AAGAAGGAGATATACATATGATGACGAATACTCTGGATGTTT<br>TAAAAGCA ( <i>Nde</i> I)                  |                  |
| BsNOX-R                                            | GTTTCTTTACCAGACTCGAGTTAGTGGTGATGATGGTGATGC<br>AGCCAAGTTGATACTTTTGAAAGCG ( <i>Xho</i> I) |                  |
| BsNOX-T2D                                          | CATATGATGGACAATACTCTGGATGTTTTAAAAG                                                      |                  |
| BsNOX-T2D                                          | CAGAGTATTGTCCATCATATGTATATCTCCTTC                                                       |                  |

|             |                               |
|-------------|-------------------------------|
| BsNOX-K25D  | GATCTCTGACGAGGAGCTGACT        |
| BsNOX-K25D  | CTCCTCGTCAGAGATCGGGG          |
| BsNOX-Y66E  | TGTAGCGGAAAATCAAAAACAAATCGT   |
| BsNOX-Y66E  | TTGATTTTCCGCTACAGGAAGAAGC     |
| BsNOX-Y66D  | TGTAGCGGACAATCAAAAACAAATCG    |
| BsNOX-Y66D  | TTGATTGTCCGCTACAGGAAGAAG      |
| BsNOX-Q68E  | AGCGTATAATGAAAAACAAATCGTTGAG  |
| BsNOX-Q68E  | CGATTTGTTTTTCATTATACGCTACAGGA |
| BsNOX-K85D  | GCGATTTAGACGCAAATGAAAACG      |
| BsNOX-K85D  | CATTTGCGTCTAAATCGCCTAAAATG    |
| BsNOX-Q114E | CTCGGCGAAATCAACGGTG           |
| BsNOX-Q114E | GTTGATTTTCGCCGAGCAATGT        |
| BsNOX-A118D | AACGGTGACTACCAAAGCGA          |
| BsNOX-A118D | TTGGTAGTCACCGTTGATTGGC        |
| BsNOX-Y119E | GGTGCTGAACAAAGCGAGC           |
| BsNOX-Y119E | GCTTTGTTTCAGCACCGTTG          |
| BsNOX-I168D | TTTGATGACAGTGAGCGCTATGT       |
| BsNOX-I168D | GCTCACTGTCATCAAATTGCTTTTG     |
| BsNOX-R171E | AGTGAGGAATATGTTCCGGTTATGC     |
| BsNOX-R171E | AACCGGAACATATTCCTCACTGATATC   |
| BsNOX-H188E | CCTGCGGAACAAAGCAACC           |
| BsNOX-H188E | GCTTTGTTCCGCAGGCTTC           |
| BsNOX-Q189D | CGCATGACAGCAACCGTCT           |
| BsNOX-Q189D | TTGCTGTCATGCGCAGGC            |
| BsNOX-K197D | GCTTTCAGACGTATCAACTTGGC       |
| BsNOX-K197D | GTTGATACGTCTGAAAGCGGC         |
| BsNOX-N20D  | TGATACAGACGCCCCGATCTCTAA      |
| BsNOX-N20D  | GGGGCGTCTGTATCATATTCCT        |
| BsNOX-N116E | GCCAAATCGAAGGTGCTTACC         |
| BsNOX-N116E | GCACCTTCGATTTGGCCGA           |

---
